# Supplementary material
Source: PubMed Central journal article supplement (PMC6463999)
Supplement: Supp_Fig1.pdf [file Supp_Fig1.pdf]

# Supplementary Data

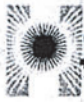

**HEALTHCAREIMAGING, LLC**

## ULTRASOUND

Medical Director, Board Certified Radiologist

### Thyroid Ultrasound

Name: [REDACTED] DOB: [REDACTED] DATE: [REDACTED]

Referred by: [REDACTED]

History & Indications: R Thy nodules + A3p

Right: 3.4 x 1.9 x 1.7

Case #4

Nodules: Y N

MP: 1.5 x 1.4 x 1.4

MP: Bx 1.7 x 1.6 x 1.4

LP: 1.5 x 1.7 x 1.7

Isthmus: 1.2

Nodules: Y N

Size: \_\_\_\_\_

Left: 4.4 x 1.4 x 1.3

Nodules: Y N

UP: \_\_\_\_\_

MP: \_\_\_\_\_

LP: \_\_\_\_\_

Parathyroids: Y  R \_\_\_\_\_ L \_\_\_\_\_

Abnormal LN: Y  R \_\_\_\_\_ L \_\_\_\_\_

Biopsy:  Y  N/RT MID Isthmus \_\_\_\_\_ LT \_\_\_\_\_ RTLN \_\_\_\_\_ LTLN \_\_\_\_\_

**IMPRESSION:**

Probable Benign: MNG \_\_\_\_\_ Colloid cyst \_\_\_\_\_ Hemorrhagic \_\_\_\_\_ Thyroiditis \_\_\_\_\_

Indeterminate: R/O follicular \_\_\_\_\_ R/O cancer \_\_\_\_\_

Consider: Pap \_\_\_\_\_ Med \_\_\_\_\_ Anaplastic \_\_\_\_\_ Other \_\_\_\_\_

LN: Probable Benign \_\_\_\_\_ Indeterminate \_\_\_\_\_ Consider Mets \_\_\_\_\_

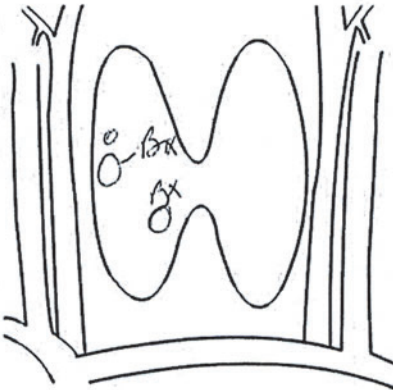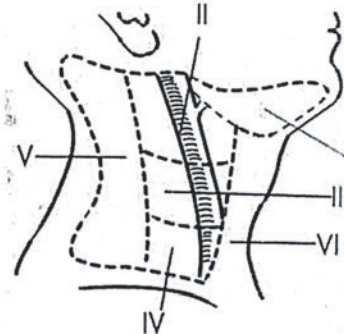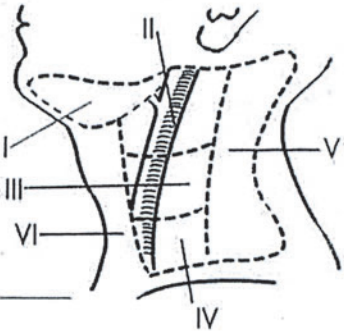

**SUPPLEMENTARY FIG. S1.** Drawings of thyroid nodules with those sampled by fine-needle aspiration (FNA) marked as Bx by the ultrasonographer with the FNA. This is available at the time of gross examination of the thyroid resection.
